# Supplementary material
Source: PubMed Central journal article supplement (PMC6170655)
Supplement: mmc1.pdf [file mmc1.pdf]

**Biophysical Journal, Volume 115**

**Supplemental Information**

**Molecular Determinants of Substrate Affinity and Enzyme Activity of a  
Cytochrome P450<sub>BM3</sub> Variant**

**Inacrist Geronimo, Catherine A. Denning, David K. Heidary, Edith C. Glazer, and Christina  
M. Payne**

**Table S1.** Predicted protonation states of substrates at physiological pH.<sup>a</sup>

| Substrate        | Number of titratable atoms | Strongest acidic/basic pK <sub>a</sub> | Charge at pH 7.4 |
|------------------|----------------------------|----------------------------------------|------------------|
| diclofenac       | 2                          | 4.00                                   | -1.00            |
| naproxen         | 1                          | 4.19                                   | -1.00            |
| warfarin         | 1                          | 5.56                                   | -0.99            |
| lovastatin       | 1                          | 14.91                                  | 0.00             |
| dextromethorphan | 1                          | 9.85                                   | 1.00             |
| MDMA             | 1                          | 10.14                                  | 1.00             |
| astemizole       | 2                          | 8.73                                   | 1.02             |
| nicotine         | 2                          | 8.58                                   | 0.94             |
| cotinine         | 2                          | 4.79                                   | 0.00             |
| metyrapone       | 2                          | 4.87                                   | 0.00             |

<sup>a</sup> <https://chemicalize.com> (accessed April 2018)**Table S2.** Van der Waals component of pairwise interaction energy (kcal/mol) for diclofenac (DIF), naproxen (NPS), *S*-warfarin (SWF), *R*-warfarin (RWF), and lovastatin (LVA) complexes. Mean and standard deviation were calculated by averaging over 5-ns blocks.

| Residue | DIF          | NPS          | SWF          | RWF          | LVA          |
|---------|--------------|--------------|--------------|--------------|--------------|
| S72     | 0.14 ± 0.57  | 1.02 ± 0.20  | -0.54 ± 0.12 | -0.18 ± 0.15 | -0.76 ± 0.25 |
| A74     | -1.23 ± 0.20 | -0.44 ± 0.08 | -1.17 ± 0.04 | -0.77 ± 0.17 | -1.18 ± 0.36 |
| L75     | -4.20 ± 0.72 | -3.60 ± 0.16 | -4.05 ± 0.14 | -2.67 ± 0.15 | -3.99 ± 0.18 |
| V78     | -0.98 ± 0.10 | -0.15 ± 0.01 | -1.04 ± 0.05 | -3.86 ± 0.20 | -1.64 ± 0.12 |
| V87     | -2.50 ± 0.32 | -1.71 ± 0.22 | -3.01 ± 0.10 | -2.19 ± 0.21 | -2.11 ± 0.13 |
| L181    | -0.63 ± 0.33 | -0.05 ± 0.02 | -0.08 ± 0.01 | -0.96 ± 0.04 | -1.29 ± 0.15 |
| T260    | -0.15 ± 0.01 | -0.06 ± 0.01 | -0.08 ± 0.01 | -1.31 ± 0.27 | -0.48 ± 0.13 |
| I263    | -1.21 ± 0.24 | -0.27 ± 0.08 | -0.19 ± 0.03 | -2.07 ± 0.10 | -1.31 ± 0.15 |
| A264    | -1.52 ± 0.22 | -1.10 ± 0.16 | -0.92 ± 0.06 | -2.06 ± 0.28 | -1.21 ± 0.08 |
| V267    | -0.73 ± 0.08 | -0.41 ± 0.21 | -0.38 ± 0.07 | -0.73 ± 0.08 | -1.05 ± 0.30 |
| T268    | -0.93 ± 0.07 | -0.79 ± 0.09 | -0.82 ± 0.02 | -0.58 ± 0.07 | -1.25 ± 0.12 |
| A328    | -0.55 ± 0.42 | -1.50 ± 0.07 | -1.62 ± 0.21 | -1.21 ± 0.21 | -1.04 ± 0.17 |
| A330    | -0.47 ± 0.25 | -1.89 ± 0.04 | -1.33 ± 0.03 | -0.50 ± 0.11 | -2.91 ± 0.19 |
| M354    | -0.09 ± 0.04 | -0.93 ± 0.06 | -0.33 ± 0.09 | -0.05 ± 0.01 | -1.24 ± 0.07 |
| L437    | -3.37 ± 0.64 | -1.64 ± 0.17 | -3.79 ± 0.13 | -3.76 ± 0.10 | -4.99 ± 0.54 |
| T438    | -2.32 ± 0.42 | -1.26 ± 0.11 | -0.94 ± 0.04 | -2.47 ± 0.30 | -3.30 ± 0.36 |

**Table S3.** Van der Waals component of pairwise interaction energy (kcal/mol) for dextromethorphan (DEX), MDMA, and astemizole (AST) complexes. Mean and standard deviation were calculated by averaging over 5-ns blocks.

| Residue | DEX          | MDMA <sup>a</sup> | MDMA <sup>b</sup> | AST <sup>a</sup> | AST <sup>b</sup> | AST <sup>c</sup> |
|---------|--------------|-------------------|-------------------|------------------|------------------|------------------|
| S72     | -0.01 ± 0.01 | -0.64 ± 0.11      | -0.19 ± 0.03      | -0.20 ± 0.11     | -1.71 ± 0.90     | -0.70 ± 0.52     |
| A74     | -0.04 ± 0.01 | -0.15 ± 0.02      | -0.88 ± 0.07      | -0.59 ± 0.12     | -0.97 ± 0.63     | -1.13 ± 0.46     |
| L75     | -1.48 ± 0.19 | -2.24 ± 0.14      | -2.02 ± 0.11      | -1.48 ± 0.42     | -3.86 ± 1.10     | -2.40 ± 0.82     |
| V78     | -1.34 ± 0.27 | -0.06 ± 0.01      | -0.99 ± 0.11      | -5.41 ± 0.38     | -2.15 ± 0.40     | -2.76 ± 0.45     |
| V87     | -3.78 ± 0.08 | -1.22 ± 0.16      | -2.06 ± 0.18      | -1.82 ± 0.12     | -5.37 ± 0.37     | -3.22 ± 0.40     |
| L181    | -1.17 ± 0.34 | -0.02 ± 0.01      | -0.17 ± 0.06      | -3.20 ± 0.41     | -0.58 ± 0.29     | -1.05 ± 0.16     |
| T260    | -2.20 ± 0.15 | -0.04 ± 0.01      | -0.13 ± 0.02      | -1.71 ± 0.09     | -0.27 ± 0.03     | -1.12 ± 0.22     |
| I263    | -3.88 ± 0.45 | -0.10 ± 0.01      | -0.70 ± 0.18      | -4.65 ± 0.32     | -1.45 ± 0.29     | -2.80 ± 0.34     |
| A264    | -1.35 ± 0.17 | -0.83 ± 0.04      | -1.71 ± 0.08      | -3.02 ± 0.14     | -1.73 ± 0.19     | -2.53 ± 0.23     |
| V267    | -1.47 ± 0.55 | -0.02 ± 0.01      | -0.60 ± 0.14      | -1.08 ± 0.09     | -1.48 ± 0.53     | -1.17 ± 0.08     |
| T268    | -1.59 ± 0.10 | -1.10 ± 0.06      | -1.12 ± 0.04      | -1.54 ± 0.05     | -1.37 ± 0.17     | -1.15 ± 0.16     |
| A328    | -0.95 ± 0.21 | -1.36 ± 0.05      | -1.16 ± 0.34      | -2.40 ± 0.09     | -1.17 ± 0.25     | -2.84 ± 0.53     |
| A330    | -0.12 ± 0.03 | -2.39 ± 0.12      | -0.38 ± 0.07      | -1.57 ± 0.20     | -0.57 ± 0.24     | -1.25 ± 0.19     |
| M354    | 0.00         | -0.72 ± 0.05      | -0.03 ± 0.01      | -0.14 ± 0.03     | -0.08 ± 0.05     | -0.05 ± 0.01     |
| L437    | -2.33 ± 0.44 | -2.65 ± 0.11      | -1.94 ± 0.14      | -5.22 ± 0.92     | -2.60 ± 0.31     | -3.86 ± 0.57     |
| T438    | -1.40 ± 0.28 | -1.28 ± 0.03      | -2.09 ± 0.08      | -3.14 ± 0.11     | -1.37 ± 0.21     | -2.76 ± 0.61     |

<sup>a</sup> positioned for N-dealkylation

<sup>b</sup> positioned for O-dealkylation

<sup>c</sup> positioned for C–H hydroxylation

**Table S4.** Van der Waals component of pairwise interaction energy (kcal/mol) for nicotine (NCT), cotinine (CTN), and metyrapone (MYT) complexes. Mean and standard deviation were calculated by averaging over 5-ns blocks.

| Residue | NCT          | CTN          | MYT          |
|---------|--------------|--------------|--------------|
| S72     | -0.12 ± 0.04 | -0.19 ± 0.05 | -0.01 ± 0.01 |
| A74     | -0.04 ± 0.01 | -0.10 ± 0.02 | -0.04 ± 0.01 |
| L75     | -1.35 ± 0.16 | -2.23 ± 0.10 | -1.34 ± 0.09 |
| V78     | -0.07 ± 0.01 | -0.40 ± 0.06 | -1.40 ± 0.07 |
| V87     | -1.61 ± 0.12 | -1.66 ± 0.05 | -3.78 ± 0.08 |
| L181    | -0.04 ± 0.01 | -0.08 ± 0.03 | -0.91 ± 0.12 |
| T260    | -0.11 ± 0.01 | -0.14 ± 0.02 | -1.82 ± 0.04 |
| I263    | -0.41 ± 0.08 | -1.11 ± 0.19 | -2.91 ± 0.05 |
| A264    | -1.54 ± 0.06 | -2.17 ± 0.17 | -2.89 ± 0.07 |
| V267    | -0.11 ± 0.03 | -0.20 ± 0.06 | -1.15 ± 0.02 |
| T268    | -1.02 ± 0.03 | -0.79 ± 0.19 | -1.21 ± 0.03 |
| A328    | -1.77 ± 0.14 | -1.78 ± 0.11 | -0.68 ± 0.13 |
| A330    | -0.94 ± 0.15 | -0.39 ± 0.04 | -0.07 ± 0.01 |
| M354    | -0.05 ± 0.01 | -0.02 ± 0.01 | 0.00         |
| L437    | -1.84 ± 0.23 | -2.41 ± 0.20 | -2.12 ± 0.08 |
| T438    | -1.55 ± 0.09 | -1.60 ± 0.08 | -1.46 ± 0.06 |

**Table S5.** Hydrogen bond occupancies of substrates.

| Substrate     | Residue | Occupancy (%) |
|---------------|---------|---------------|
| diclofenac:O1 | S72:OG  | 28            |
| diclofenac:O2 | S72:OG  | 12            |
| naproxen:O1   | S72:OG  | 98            |
| naproxen:O1   | S72:N   | 40            |
| naproxen:O2   | S332:N  | 87            |
| naproxen:O2   | K69:NZ  | 88            |
| S-warfarin:O2 | K69:NZ  | 73            |
| MDMA:N        | L437:O  | 61            |

**Table S6.** Hydrogen bond occupancies of heme propionate A oxygen atoms.

| Substrate        | Heme propionate O atom | Hydrogen bond donor | Occupancy (%) |
|------------------|------------------------|---------------------|---------------|
| dextromethorphan | O1A                    | K69:NZ              | 24            |
|                  | O2A                    | K69:NZ              | 27            |
| MDMA             | O1A                    | K69:NZ              | 74            |
|                  | O2A                    | MDMA:N              | 61            |
| astemizole       | O1A                    | K69:NZ              | 34            |
|                  | O2A                    | K69:NZ              | 27            |
| nicotine         | O1A                    | K69:NZ              | 16            |
|                  |                        | nicotine:N          | 39            |
|                  | O2A                    | nicotine:N          | 46            |
| naproxen         | O1A                    | N395:N              | 19            |
|                  | O2A                    | N395:N              | 17            |
| S-warfarin       | O1A                    | K69:NZ              | 53            |
|                  | O2A                    | K69:NZ              | 27            |

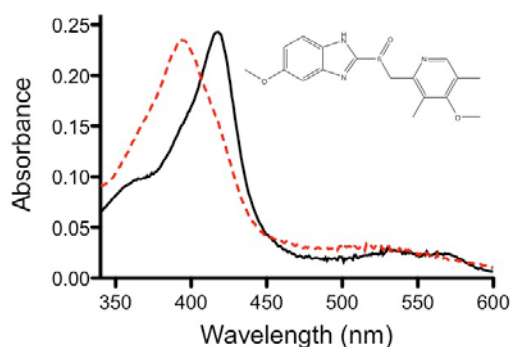**Figure S1.** Absorption spectra of PM P450<sub>BM3</sub> bound to omeprazole (inset). The black solid curve indicates the resting, low spin state when water is bound to ferric iron. The red dotted curve represents the 100% high spin state in which water is no longer bound and omeprazole is in the active site.

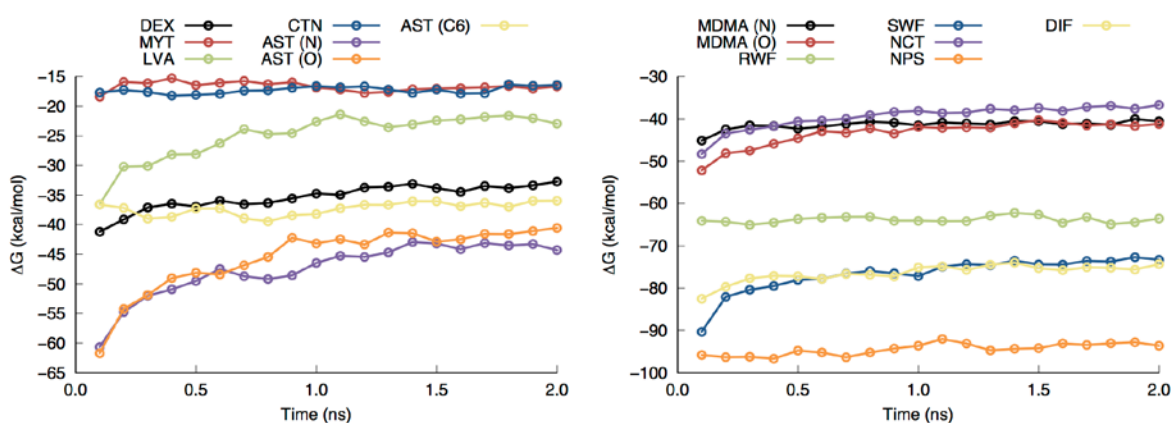

**Figure S2.** Gibbs free energy of the enzyme-substrate complexes during the last 2 ns of FEP/ $\lambda$ -REMD. The substrates are dextromethorphan (DEX), metyrapone (MYT), lovastatin (LVA), cotinine (CTN), astemizole (AST), MDMA, *R*-warfarin (RWF), *S*-warfarin (SWF), nicotine (NCT), naproxen (NPS), and diclofenac (DIF). Different binding poses were modeled for MDMA and astemizole, including N-dealkylation (N), O-dealkylation (O) and C–H hydroxylation (C6).

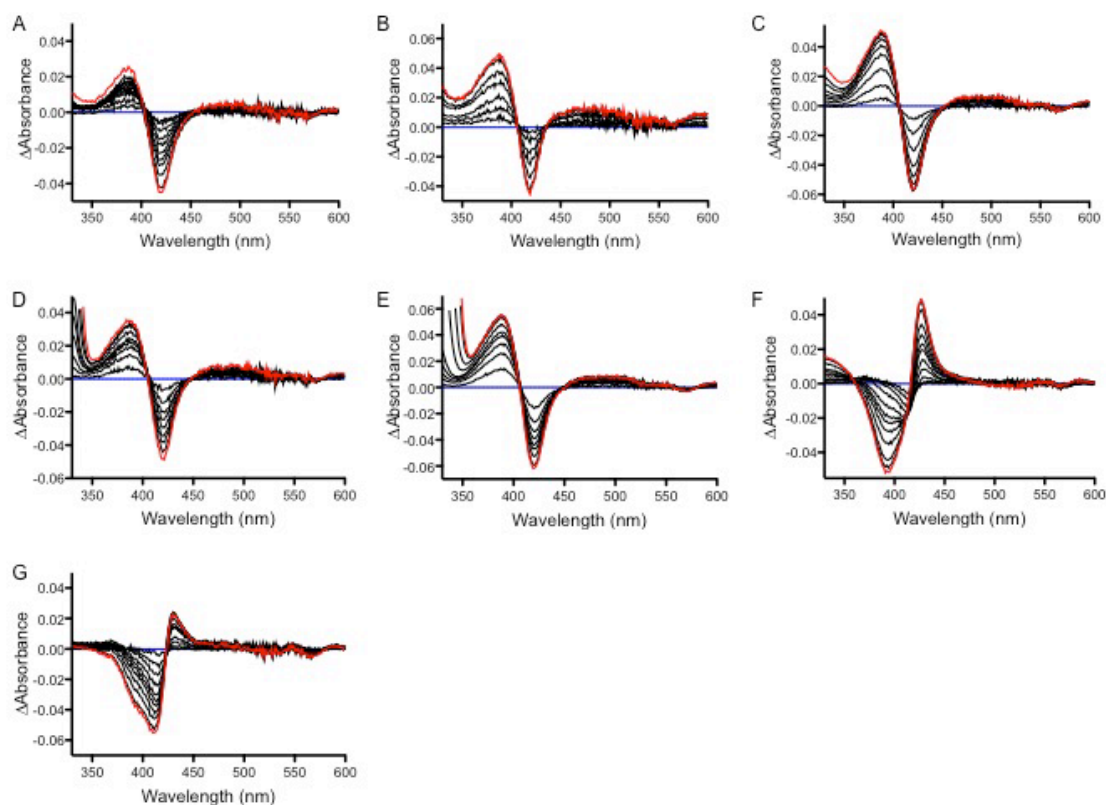

**Figure S3.** Difference spectra of all compounds bound to PM P450<sub>BM3</sub> studied experimentally. The blue line is PM P450<sub>BM3</sub> in which no compound is present, and the red line is fully saturated. (A) Dextromethorphan, (B) diclofenac, (C) lovastatin, (D) naproxen, and (E) racemic warfarin exhibit a type I spectral shift. (F) Cotinine and (G) nicotine exhibit a type II spectral shift.

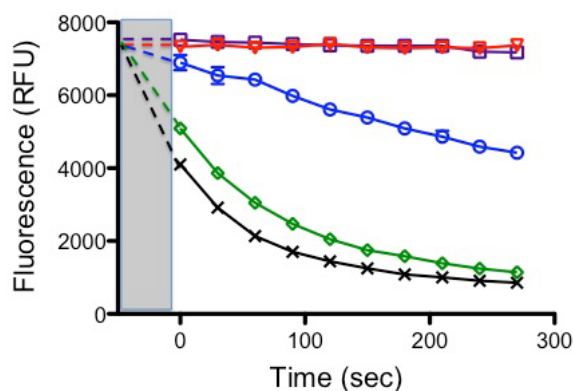

**Figure S4.** A 7-ethoxyresorufin-O-deethylase (EROD) activity assay was performed to determine if compounds that induced a type II spectral shift efficiently inhibited metabolism of the fluorescent substrate by PM P450<sub>BM3</sub>. Fluorescence was monitored by excitation at 535 nm and emission at 595 nm. The gray box indicates the dead time of the instrument, and the dashed lines are projected emissions during that time (approximately 50 seconds). The black crosses indicate metabolism of 7-ethoxyresorufin when PM P450<sub>BM3</sub> was not inhibited. In contrast, the red triangles indicate the response when 7-ethoxyresorufin is not metabolized. Metyrapone-bound PM P450<sub>BM3</sub> (purple squares) was fully inhibited, whereas when cotinine was bound (green diamonds), activity was barely impacted. Interestingly, nicotine (blue circles) had an inhibitory effect on 7-ethoxyresorufin metabolism, but activity was still observed.

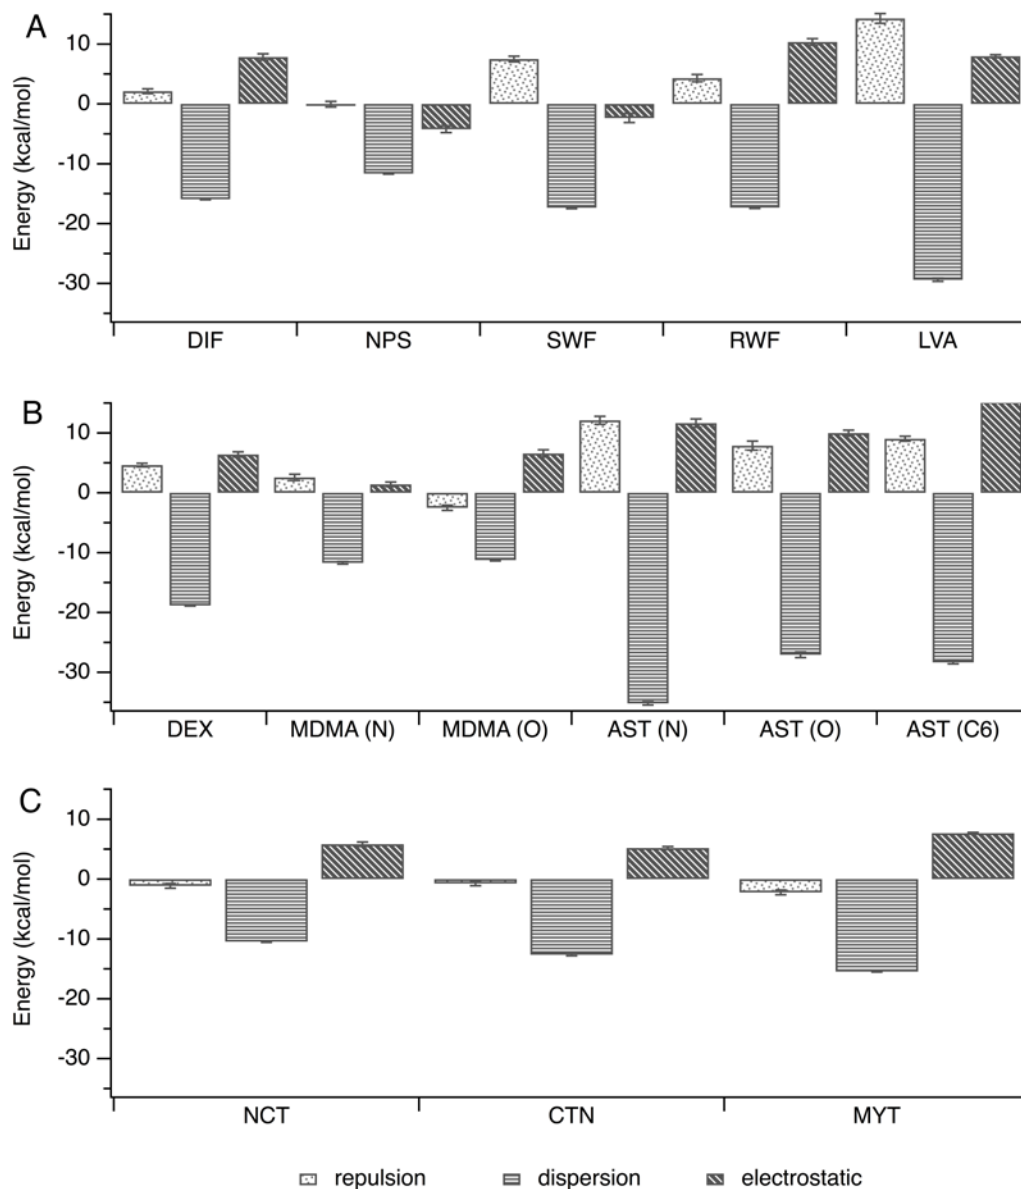

**Figure S5.** Repulsive, dispersive, and electrostatic energy contributions to the binding of (A) diclofenac (DIF), naproxen (NPS), *S*-warfarin (SWF), *R*-warfarin (RWF), lovastatin (LVA), (B) dextromethorphan (DEX), MDMA, astemizole (AST), (C) nicotine (NCT), cotinine (CTN), and metyrapone (MYT). Different binding poses were modeled for MDMA and astemizole, including N-dealkylation (N), O-dealkylation (O) and C–H hydroxylation (C6).

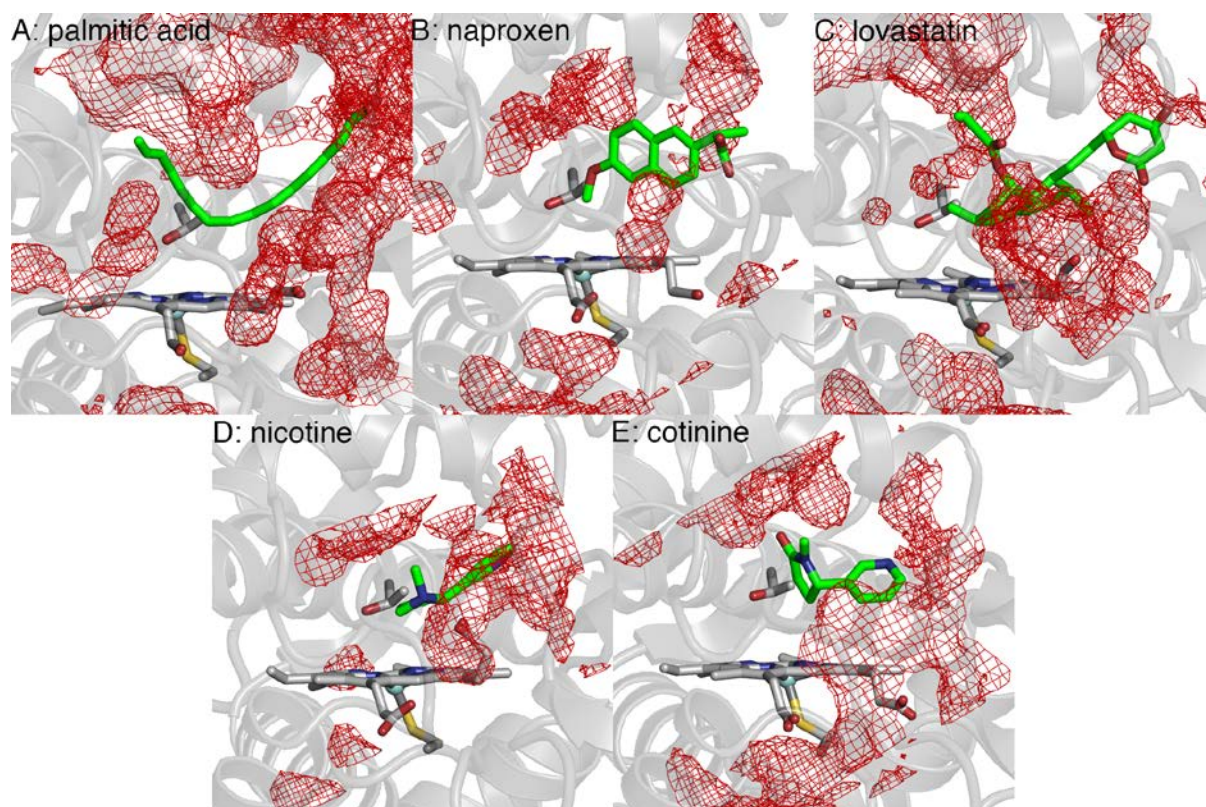

**Figure S6.** Water density at the PM P450<sub>BM3</sub> substrate channel, with the reference structure averaged from the MD simulation. T268, located at the distal side of the heme (helix I) and believed to play a role in proton delivery and oxygen activation, is also shown.



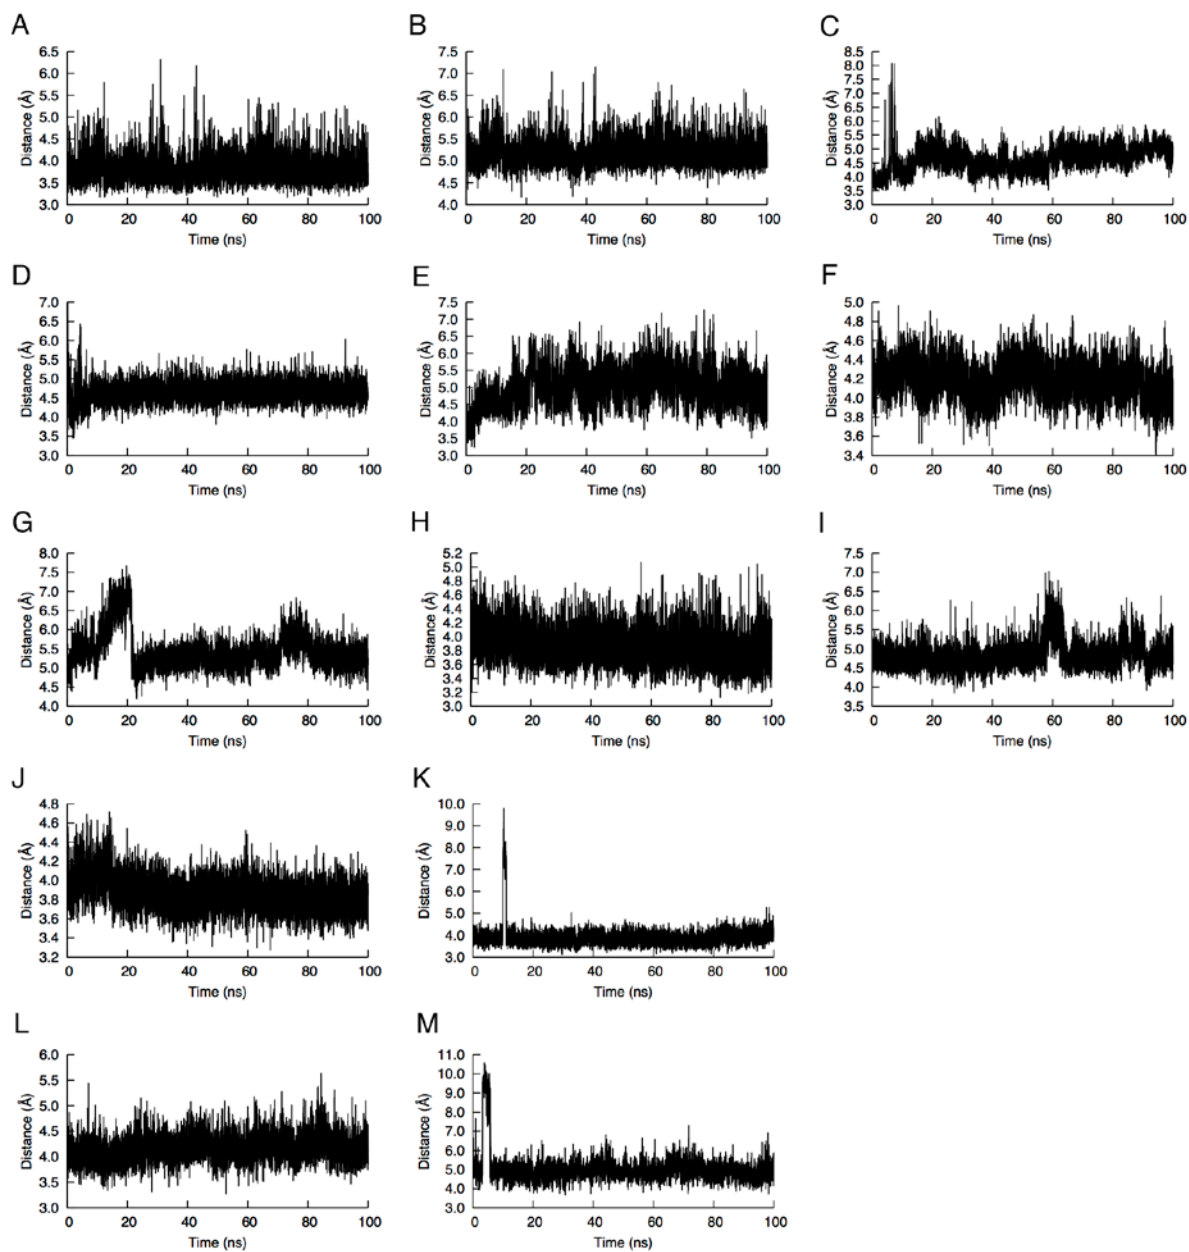

**Figure S7.** Plot of the distance between heme Fe and reacting atom of (A) diclofenac (C4'), (B) naproxen (methoxy C), (C) lovastatin (C6), (D) *S*-warfarin (C7), (E) *R*-warfarin (C4'), (F) dextromethorphan (protonated N), (G–I) astemizole (protonated N, methoxy C, C6), (J, K) MDMA (protonated N, C2), (L) nicotine (C5'), and (M) cotinine (C4').

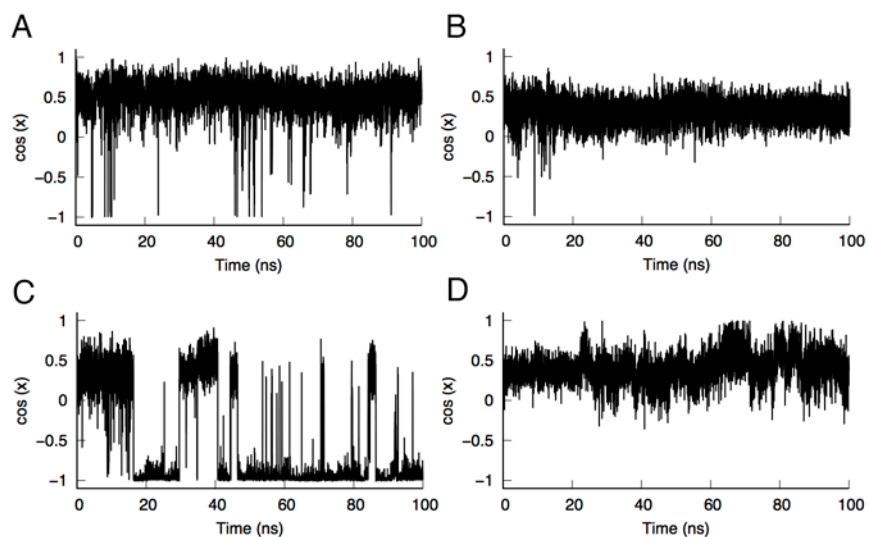

**Figure S8.** Plot of the cosine of the heme propionate A dihedral angle in (A) dextromethorphan, (B) MDMA, (C) astemizole, and (D) nicotine complexes of PM P450<sub>BM3</sub>. The cosine of the dihedral angle in the PM-palmitic acid crystal structure (PDB ID: 4ZFB) is approximately -1.
